# Supplementary material
Source: publisher figshare collection journal article supplement (https://aacr.figshare.com/articles/dataset/_/22363997)
Supplement: Supplementary file 1 [file 39808217]

## Supplementary Table 1

for Huang HE et al, 'A recurrent chromosome breakpoint in breast cancer at the *NRG1/neuregulin 1/herregulin* gene'

### Proteins tested by immunohistochemistry on tissue microarrays and characteristics of the corresponding antibodies.

| Protein (acronym)                                 | Antibody Type | Origin                   | Clone or designation | Pretreatment                     | Antibody incubation | Dilution     |
|---------------------------------------------------|---------------|--------------------------|----------------------|----------------------------------|---------------------|--------------|
| Epidermal growth factor receptor (EGFR)           | mmab          | Zymed Laboratories       | 31G7                 | Pepsin (30 min, 37°C)            | 1 hour              | 1/20         |
| Tyrosine kinase receptor ErbB2                    | mmab          | Novocastra Laboratories  | CB 11                | Citrate buffer pH6 (40min, 98°C) | 1 hour              | 1/500        |
| Tyrosine kinase receptor ErbB3                    | mmab          | Gullick WJ*              | RTJ1                 | Citrate buffer pH6 (40min, 98°C) | 1 hour              | 1/200        |
| Tyrosine kinase receptor ErbB4                    | mmab          | Gullick WJ*              | HFR1                 | Citrate buffer pH6 (40min, 98°C) | 1 hour              | 1/200        |
| Estrogen receptor (ER)                            | mmab          | Novocastra Laboratories  | 6F11                 | Citrate buffer pH6 (40min, 98°C) | 1 hour              | 1/60         |
| Fibroblast growth factor receptor 1 (FGFR1)       | rpab          | Santa Cruz Biotechnology | Sc-121               | DTRS (40 min, 98°C)              | 1 hour              | 1/200        |
| Transforming acidic coiled-coil 1/Taxin 1 (TACC1) | rpab          | Upstate Biotechnology    | 07-229               | DTRS (40 min, 98°C)              | 1 hour              | 1/200        |
| Heregulin/Neuregulin (NRG1 $\alpha$ )             | rpab          | Gullick WJ*              | HRG76                | -                                | 18 hours            | 3 $\mu$ g/ml |
| Heregulin/Neuregulin (NRG1 $\beta$ )              | rpab          | Gullick WJ*              | HRG102               | -                                | 18 hours            | 3 $\mu$ g/ml |

mmab: mouse monoclonal antibody; rpab: rabbit polyclonal antibody; DTRS: Dako target retrieval solution. \*Ref. 8.

Conditions for the two anti-NRG1 antibodies are given in main text. For the other antibodies, antigen retrieval pretreatment was done. Slides were transferred to a Dako autostainer, except for Dako-HerceptTest™ where guidelines are imposed by the manufacturer. Endogenous peroxidase activity was quenched by treatment with 0.1% H<sub>2</sub>O<sub>2</sub>, then slides were pre-incubated with blocking serum. Slides were incubated sequentially with the affinity-purified antibody for one or two hours; biotinylated antibody against rabbit IgG for 20 min; streptavidin-conjugated peroxidase (Dako LSAB<sup>R</sup>2 kit); and peroxidase substrate, diaminobenzidine. For ErbB2, status was defined using the Dako scale (0 to 3+)
